# Supplementary material for: Identification of Small Molecules Inhibiting Cardiomyocyte Necrosis and Apoptosis by Autophagy Induction and Metabolism Reprogramming
Source: MDPI journal article supplement (doi:10.3390/cells11030474), 2022-01-29
Supplement: s1 [file s1]

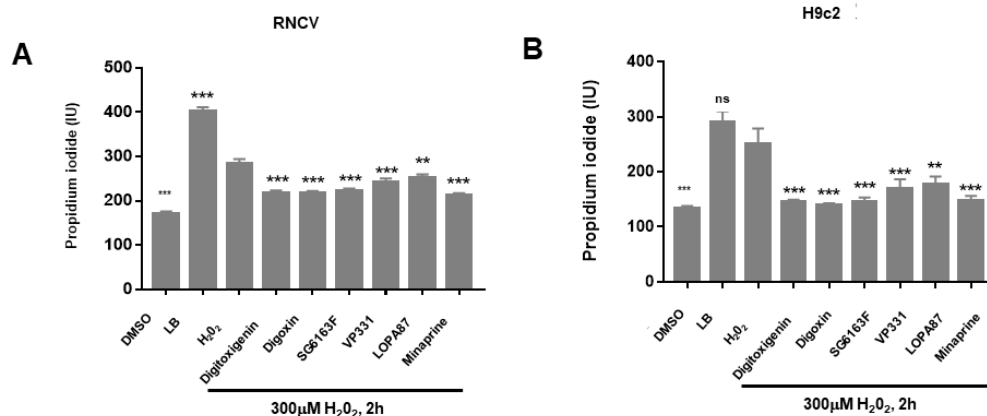

**Figure Supp 1**

**Figure S1. Selected compounds inhibition of H<sub>2</sub>O<sub>2</sub> induced-necrosis in RNCVs and H9c2.** (A) RNCVs and (B) H9c2 cell membrane permeabilisation was measured following propidium iodide labelling by spectrofluorimetry. Data are presented as mean ± SEM with one-way ANOVA, Sidak's multiple comparisons test. \*,  $p < 0.05$ , \*\*,  $p < 0.01$ , \*\*\*,  $p < 0.001$  vs DMSO.

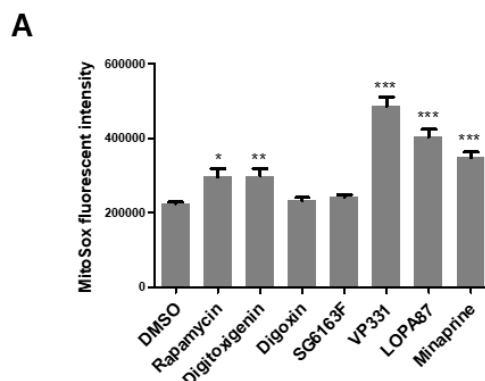

**Figure S2. Effects of compounds on mitochondrial ROS production.** RNCVs were treated with 0.1% DMSO, 3 μM rapamycin, 1 μM of digitoxigenin, digoxin, minaprine, VP331, LOPA87 and SG6163F for 6 h, then ROS production was detected by 5 μM MitoSOX fluorescent probe. Fluorescence was captured by Leica confocal microscope and quantification of mitochondrial fluorescent intensity was evaluated by Image J. Data are presented as mean ± SEM with one-way ANOVA, Sidak's multiple comparisons test. \*,  $p < 0.05$ , \*\*,  $p < 0.01$ , \*\*\*,  $p < 0.001$  vs DMSO.
